# Supplementary material
Source: PubMed Central journal article supplement (PMC3179829)
Supplement: NIHMS283199-supplement-01.pdf [file NIHMS283199-supplement-01.pdf]

**Table 1: Risk factors for relapse of a first episode of anterior uveitis\***

| Characteristics    | Total patients | Number with recurrence | Person-years | Incidence rate—recurrence events per person-year (95% Confidence Interval [CI]) | Crude hazard ratio for recurrence (95% CI) | Overall crude p-value |
|--------------------|----------------|------------------------|--------------|---------------------------------------------------------------------------------|--------------------------------------------|-----------------------|
| Number of Patients | 102            | 40                     | 165          | 0.2 (0.2 - 0.3)                                                                 |                                            |                       |
| Age, years         |                |                        |              |                                                                                 |                                            |                       |
| Age < 18           | 9              | 4                      | 6.6          | 0.6 (0.2 - 1.6)                                                                 | 2.0 (0.6 - 6.4)                            | 0.05                  |
| 18 ≤ age<35        | 21             | 13                     | 18.7         | 0.7 (0.4 - 1.2)                                                                 | 2.7 (1.3 – 6.0)                            | 0.05                  |
| 35 ≤ age<55        | 42             | 13                     | 91.4         | 0.1 (0.1 - 0.2)                                                                 | 1.00 (Reference Group)                     |                       |
| Age ≥ 55           | 30             | 10                     | 48           | 0.2 (0.1 - 0.4)                                                                 | 1.1 (0.5 - 2.5)                            | 0.05                  |
| Sex                |                |                        |              |                                                                                 |                                            |                       |
| Male               | 41             | 14                     | 64.9         | 0.2 (0.1 - 0.4)                                                                 | 1.00 (Reference Group)                     |                       |
| Female             | 61             | 26                     | 99.8         | 0.3 (0.2 - 0.4)                                                                 | 1.2 (0.6 - 2.2)                            | 0.66                  |
| Race               |                |                        |              |                                                                                 |                                            |                       |
| White              | 80             | 29                     | 134.6        | 0.2 (0.1 - 0.3)                                                                 | 1.00 (Reference Group)                     |                       |
| Black              | 13             | 7                      | 17.5         | 0.4 (0.2 - 0.8)                                                                 | 1.50 (0.7 - 3.4)                           | 0.63                  |
| Hispanic or Other  | 9              | 4                      | 12.5         | 0.3 (0.1 - 0.8)                                                                 | 1.1 (0.4 - 3.3)                            | 0.63                  |
| Smoking            |                |                        |              |                                                                                 |                                            |                       |
| Never Smoked       | 76             | 28                     | 115          | 0.2 (0.2 - 0.4)                                                                 | 1.00 (Reference Group)                     |                       |

|                                                                |    |    |      |                 |                 |      |
|----------------------------------------------------------------|----|----|------|-----------------|-----------------|------|
| Current Smoker                                                 | 11 | 4  | 21.7 | 0.2 (0.1 - 0.5) | 1.1 (0.4 - 3.2) | 0.71 |
| Former Smoker                                                  | 11 | 6  | 15.8 | 0.4 (0.1 - 0.8) | 1.7 (0.7 - 4.1) | 0.71 |
| Unknown                                                        | 4  | 2  | 12.1 | 0.2 (0 - 0.6)   | 1.0 (0.2 - 4.1) | 0.71 |
| Systemic Conditions*                                           |    |    |      |                 |                 |      |
| HLA-B27+                                                       | 24 | 10 | 45.2 | 0.2 (0.1 - 0.4) | 1.0 (0.5 - 2)   | 0.98 |
| Spondyloarthropathy:<br>any form                               | 11 | 4  | 17.7 | 0.2 (0.1 - 0.6) | 1.0 (0.4 - 2.7) | 0.96 |
| Inflammatory bowel<br>disease (without<br>spondyloarthropathy) | 4  | 1  | 3.2  | 0.3 (0 - 1.7)   | 0.9 (0.1 - 6.2) | 0.87 |
| Juvenile rheumatoid<br>arthritis                               | 3  | 2  | 2.6  | 0.8 (0.1 - 2.8) | 2.0 (0.5 - 8.2) | 0.36 |
| Sarcoidosis                                                    | 5  | 4  | 9.9  | 0.4 (0.1 - 1.0) | 1.6 (0.6 - 4.5) | 0.37 |
| Hypertension                                                   | 21 | 6  | 32.1 | 0.2 (0.1-0.4)   | 0.6 (0.3-1.6)   | 0.35 |

\*Compared with patients who did not have each systemic diagnosis in question. No cases of primary anterior uveitis were observed in association with the following systemic inflammatory diseases: polyarteritis nodosum, reactive arthritis, Wegener's granulomatosis, Takayasu's arteritis, scleroderma, dermatomyositis, polymyositis, relapsing polychondritis, Sjögren's Syndrome, Cogan's syndrome, HLA-A29, or familial systemic granulomatosis. Only 1 or 2 cases of primary anterior uveitis were observed in patients with Behçet's disease, multiple sclerosis, ulcerative colitis, Crohn's disease, systemic lupus erythematosus and rheumatoid arthritis, making it unfeasible to assess for differences in relapse risk in association with these conditions.
